# Supplementary material for: Probing the Role of Cu(II) Ions on Protein Aggregation Using Two Model Proteins
Source: PubMed Central journal article supplement — ACS Omega. 2021 Dec 15;6(51):35559–71. doi: 10.1021/acsomega.1c05119 (PMC8717569; doi:10.1021/acsomega.1c05119), 2021-12-15
Supplement: ao1c05119_si_001.pdf [file ao1c05119_si_001.pdf]

# Probing the Role of Cu(II) ion on Protein Aggregation Using Two Model Proteins

Reshmi John<sup>1,2</sup>, Jissy Mathew<sup>2</sup>, Anu Mathew<sup>3</sup>, Charuvila T. Aravindakumar<sup>1,3,4\*</sup>, Usha K.

Aravind<sup>5\*</sup>

<sup>1</sup>Inter University Instrumentation Centre, <sup>3</sup>Sophisticated Analytical Instrument Facility, <sup>4</sup>School of Environmental Sciences, Mahatma Gandhi University, Kottayam- 686560, Kerala, India

<sup>2</sup>Research Department of Chemistry, S. B. College, Assumption College Changanacherry, Kottayam, Kerala 686101, India

<sup>5</sup>School of Environmental Studies, Cochin University of Science and Technology (CUSAT), Kochi- 682022, Kerala, India.

\*Correspondence to: [cta@mgu.ac.in](mailto:cta@mgu.ac.in) , [ukaravind@gmail.com](mailto:ukaravind@gmail.com)

Supporting Information

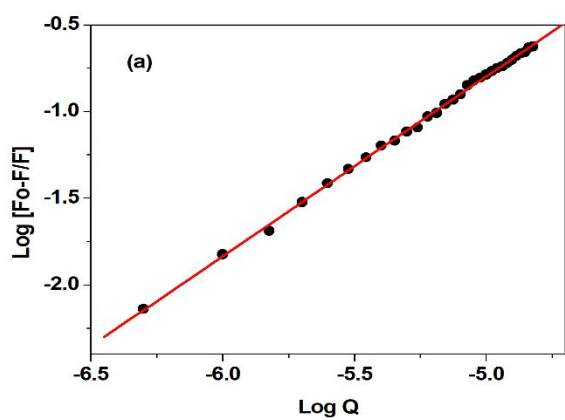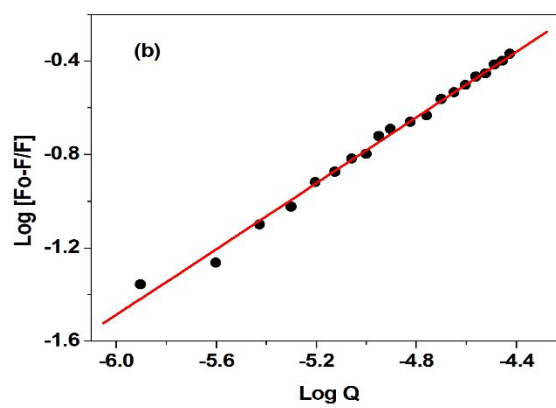

| Cu(II)ions | $\tau_1$ (ns) | $\tau_2$ (ns) | $\alpha_1$ | $\alpha_2$ | $\tau_m$ (ns) | $\chi^2$ |
|------------|---------------|---------------|------------|------------|---------------|----------|
| 0          | 3.51          | 6.94          | 22.14      | 77.86      | 6.18          | 1.09     |
| 1          | 3.45          | 6.88          | 21.79      | 78.21      | 6.13          | 1.12     |
| 1.50       | 3.29          | 6.82          | 20.44      | 79.56      | 6.10          | 1.11     |
| 2          | 3.39          | 6.86          | 22.02      | 77.98      | 6.09          | 1.09     |

|                           |      |      |      |       |       |      |      |             |
|---------------------------|------|------|------|-------|-------|------|------|-------------|
| Figure S1.                | 2.50 | 3.45 | 6.86 | 22.04 | 77.96 | 6.11 | 1.12 | Plot of     |
| Log[F <sub>0</sub> - F/F] | 5    | 3.44 | 6.86 | 22.90 | 77.10 | 6.08 | 1.11 | versus LogQ |
| for (a) BSA               | 7    | 3.36 | 6.94 | 21.32 | 78.68 | 6.18 | 1.12 | and (b) HSA |
| at pH 7.4 and             | 15   | 3.40 | 6.79 | 23.74 | 76.26 | 5.98 | 1.13 | 298 K.      |

Table S1. Fluorescence life time parameters of BSA in presence of Cu(II) ion.

| Cu(II)ions | $\tau_1$ (ns) | $\tau_2$ (ns) | $\tau_3$ (ns) | $\alpha_1$ | $\alpha_2$ | $\alpha_3$ | $\tau_m$ (ns) | $\chi^2$ |
|------------|---------------|---------------|---------------|------------|------------|------------|---------------|----------|
| 0          | 9.99          | 3.33          | 7.33          | 9.13       | 44.28      | 46.59      | 5.80          | 1.12     |
| 2.50       | 1.23          | 3.85          | 7.65          | 13.92      | 47.21      | 38.87      | 4.96          | 1.13     |
| 3.75       | 3.42          | 1.09          | 7.33          | 43.37      | 10.86      | 45.77      | 4.96          | 1.17     |
| 5          | 9.21          | 3.29          | 7.27          | 8.87       | 44.67      | 46.46      | 5.67          | 1.15     |
| 7.50       | 3.51          | 1.14          | 7.41          | 44.58      | 11.66      | 43.76      | 4.94          | 1.15     |
| 10         | 3.59          | 1.10          | 7.56          | 47.38      | 11.41      | 41.21      | 4.95          | 1.14     |
| 11.25      | 1.16          | 3.70          | 7.57          | 12.61      | 46.98      | 40.41      | 4.94          | 1.16     |
| 12.50      | 1.14          | 3.61          | 7.48          | 12.19      | 45.88      | 41.94      | 4.93          | 1.21     |
| 17.50      | 1.13          | 3.53          | 7.38          | 11.88      | 44.83      | 43.29      | 4.91          | 1.15     |
| 20         | 3.36          | 1.00          | 7.28          | 44.14      | 10.19      | 45.67      | 4.91          | 1.14     |
| 25         | 3.64          | 1.18          | 7.49          | 45.50      | 12.89      | 41.61      | 4.92          | 1.15     |
| 27.50      | 1.21          | 3.81          | 7.65          | 13.72      | 48.29      | 37.99      | 4.91          | 1.14     |
| 32.50      | 1.04          | 3.46          | 7.36          | 11.02      | 45.45      | 43.54      | 4.89          | 1.14     |
| 37.50      | 1.06          | 3.51          | 7.42          | 10.98      | 46.95      | 42.07      | 4.89          | 1.13     |

Table S2. Fluorescence life time parameters of HSA in presence of Cu(II) ion

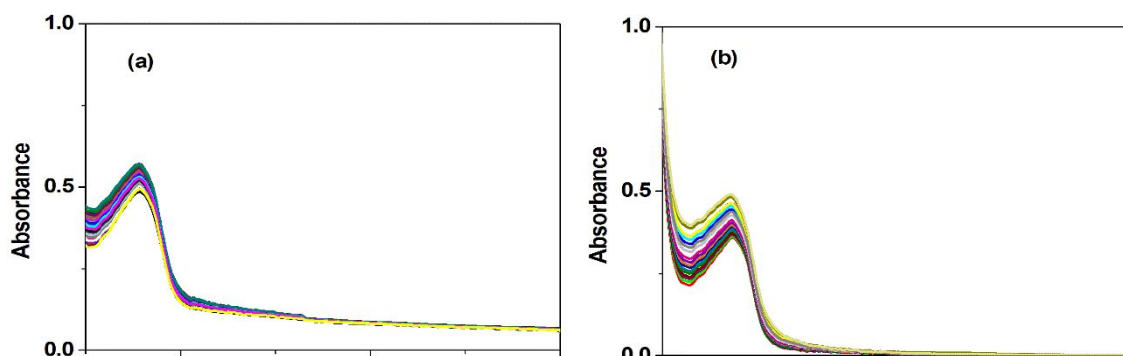

Figure S2. UV-Vis spectra of (a) BSA and (b) HSA in presence of increasing concentrations of Cu(II) ion at pH 7.4 and 298 K.

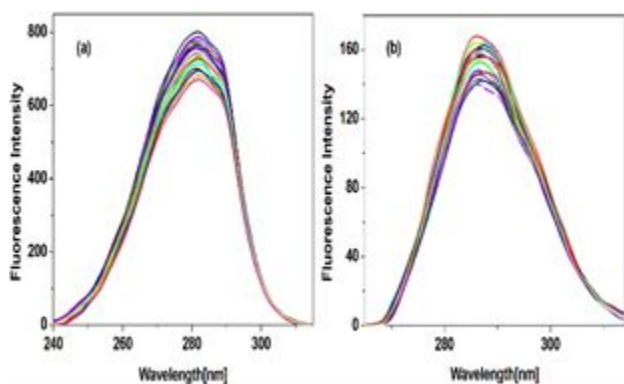

Figure S3. Synchronous fluorescence spectra of BSA in the presence of increasing concentrations of Cu(II): [BSA] = 10  $\mu$ M; [Cu(II)] = 0–15  $\mu$ M at 298 K; pH 7.4. (a)  $\Delta\lambda = 60$  nm; (b)  $\Delta\lambda = 15$  nm.

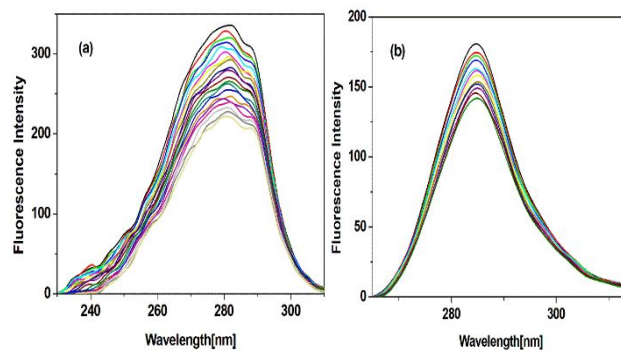

Figure S4. Synchronous fluorescence spectra of HSA in the presence of increasing concentrations of Cu(II): [HSA] = 10  $\mu$ M; [Cu(II)] = 0–37.50  $\mu$ M at 298 K; pH 7.4. (a)  $\Delta\lambda$  = 60 nm; (b)  $\Delta\lambda$  = 15 nm.

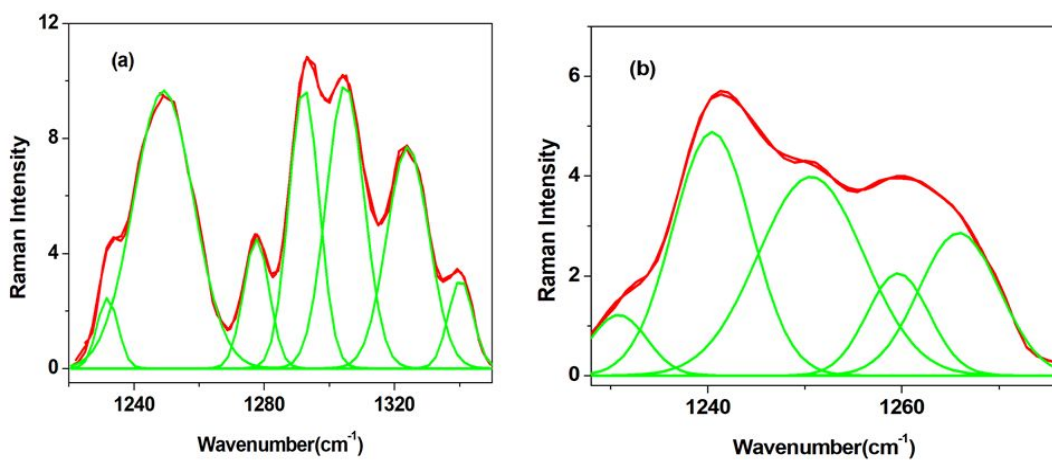

Figure S5. (a) Deconvolution of Amide III region of BSA alone and (b) with the addition of 15  $\mu$ M Cu(II) ion displaying an increment in antiparallel  $\beta$ -sheet and Random clew conformations.

|                | BSA 7.4 | + 5 $\mu$ M Cu(II) | +7 $\mu$ M Cu(II) | +15 $\mu$ M Cu(II) |
|----------------|---------|--------------------|-------------------|--------------------|
| $\beta$ sheet  | 8.57    | 15.49              | 17.18             | 20.57              |
| $\alpha$ helix | 10.67   | 10.14              | ----              | ----               |
| Random clew    | 24.96   | 16.08              | 16.96             | 27.76              |

Table S3. Percentage analysis of different secondary structural elements obtained after deconvolution of Amide III (1200–1300  $\text{cm}^{-1}$ ) band of BSA and with the addition of varying concentrations of Cu(II) ion, pH 7.4

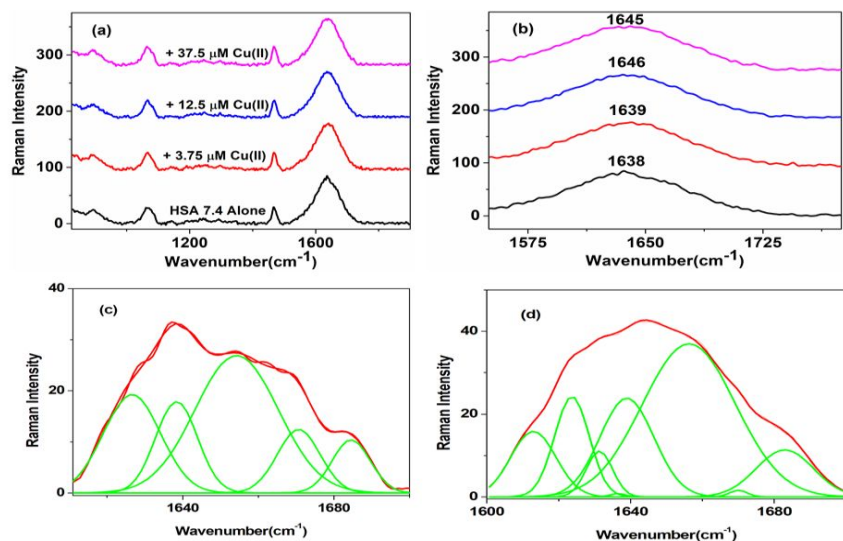

Figure S6. Raman spectra of HSA and HSA–Cu(II) complex at physiological pH. (a) Raman spectra of HSA alone and in the presence of different concentrations of Cu(II) (800–1800  $\text{cm}^{-1}$ ). (b) Amide I (1600 -1700  $\text{cm}^{-1}$ ) region. (c and d) Amide I region of HSA alone and with the addition of 37.50  $\mu\text{M}$  Cu(II) deconvoluted displaying an increase in  $\alpha$ -helix conformation.

|                | HSA 7.4 | + 3.75 $\mu\text{M}$ Cu(II) | + 12.50 $\mu\text{M}$ Cu(II) | + 37.50 $\mu\text{M}$ Cu(II) |
|----------------|---------|-----------------------------|------------------------------|------------------------------|
| $\beta$ -sheet | 15.94   | 11.89                       | 11.72                        | 7.70                         |

|                      |       |       |       |       |
|----------------------|-------|-------|-------|-------|
| $\alpha$ -helix      | 31.63 | 14.04 | 15.19 | 27.19 |
| Random coils         | ----  | ----  | 22.18 | ----  |
| $\beta$ -turns       | 16.34 | 23.05 | 14.96 | 16.64 |
| Antiparallel $\beta$ | 21.66 | 13.13 | 18.80 | 10.10 |

Table S4. Percentage analysis of different secondary structural elements obtained after deconvolution of the Amide I ( $1600\text{--}1700\text{ cm}^{-1}$ ) region of HSA and with the addition of varying concentration of Cu(II) (pH 7.4).
